# Supplementary material for: Endurance Exercise Attenuates Established Progressive Experimental Autoimmune Encephalomyelitis and Is Associated with an Amelioration of Innate Immune Responses in NOD Mice
Source: MDPI journal article supplement (doi:10.3390/ijms242115798), 2023-10-31
Supplement: s1 [file s1]

**Table S1.** Hallmarks of the clinical disease courses of both NOD1- and NOD2-EAE mice. Data represent the mean EAE score  $\pm$  SD; \*p-value  $\leq 0.05$ ; non-significant differences are not separately indicated.

|                                                 | NOD1 control     | NOD1 EE           | NOD2 control      | NOD2 EE             |
|-------------------------------------------------|------------------|-------------------|-------------------|---------------------|
| <i>number of mice</i>                           | 8                | 8                 | 8                 | 8                   |
| <i>number of eliminated mice</i>                | -                | -                 | 2                 | -                   |
| <i>rate of successful disease induction</i>     | 100 %            | 100 %             | 100 %             | 100 %               |
| <i>day of onset</i>                             | 9 $\pm$ 0.76     | 9 $\pm$ 0.54      | 9.2 $\pm$ 0.41    | 9.1 $\pm$ 0.35      |
| <i>peak score</i>                               | 3.7 $\pm$ 0.22   | 3.9 $\pm$ 0.32    | 3.2 $\pm$ 0.40    | 2.7 $\pm$ 0.62      |
| <i>remission score</i>                          | 2.8 $\pm$ 0.3    | 2.8 $\pm$ 0.43    | 2.6 $\pm$ 0.38    | 2 $\pm$ 0.69        |
| <i>end score</i>                                | 3 $\pm$ 0.58     | 2.8 $\pm$ 0.57    | 3.6 $\pm$ 0.44    | 3 $\pm$ 0.39 *      |
| <i>burden of disease (area under the curve)</i> | 138.1 $\pm$ 9.58 | 135.6 $\pm$ 13.56 | 192.7 $\pm$ 19.98 | 157.2 $\pm$ 28.17 * |
