# Supplementary material for: Endurance Exercise Attenuates Established Progressive Experimental Autoimmune Encephalomyelitis and Is Associated with an Amelioration of Innate Immune Responses in NOD Mice
Source: MDPI journal article supplement (doi:10.3390/ijms242115798), 2023-10-31
Supplement: s1 [file s1]

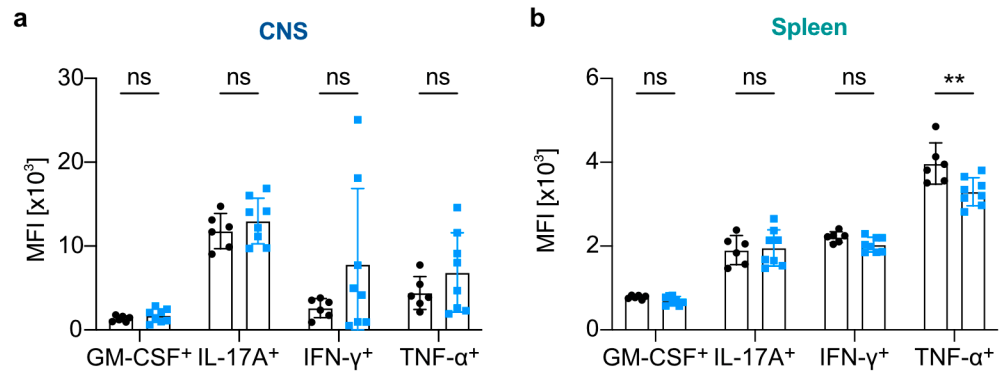

**Figure S2.** *Per-cell* cytokine production of CD4<sup>+</sup> T cells (a) Mean fluorescence intensity (MFI) of CD4<sup>+</sup> T cells producing proinflammatory cytokines in the CNS of NOD2 control (n = 6) and EE (n = 8) mice. (b) MFI of CD4<sup>+</sup> T cells producing proinflammatory cytokines in the spleen of NOD2 control (n = 6) and EE (n = 8) mice. (a,b) Data are shown as mean ± SD. Each data point represents an individual mouse. Welch's test or Mann-Whitney U tests were used for pairwise comparisons. \*\*p-value ≤ 0.01.
